# Supplementary material for: Artificial intelligence enables comprehensive genome interpretation and nomination of candidate diagnoses for rare genetic diseases
Source: Genome Med. 2021 Oct 14;13:153. doi: 10.1186/s13073-021-00965-0 (PMC8515723; doi:10.1186/s13073-021-00965-0)
Supplement: Supplementary file 1 — Additional file 1. Supplementary Tables (Tables S1-S14). [file 13073_2021_965_MOESM1_ESM.xlsx]

## Sheet: Table S1
Table S1. Benchmark cohort case description.
Case ID	Pedigree	Assay	Dx Gene-1	Variant Type	Variant-1 HGVS_g	Variant-1 HGVS_c	Variant-1 HGVS_p	Classification	Mode of inheritance	Dx Gene-2	Variant-2 HGVS_g	Variant-2 HGVS_c	Variant-2 HGVS_p	Classification	Second mode of inheritance	Diagnosis	Curated HPO Terms
44670	Duo	WGS	SCN1A	SNV	2:g.166900340A>T	ENST00000303395:c.1882T>A	p.Ser628Thr	Likely Pathogenic	Dominant							Dravet Syndrome	HP:0012469,HP:0001250
44671	Trio	WGS	NPAP1	Tetrasomy	15:g.1_102531393dup	NA	NA	Pathogenic	Dominant-De Novo							Isodicentric Chromosome 15 Syndrome	HP:0002870,HP:0002871
45020	Trio	WGS	PCDH19	Large Del	X:g.92925011_99669272del	NA	NA	Pathogenic	Dominant-De Novo							Epilepsy, Familial Focal, With Variable Foci 4	HP:0002373,HP:0001250
45907	Single	WGS	NPC1	SNV	18:g.21119857G>A	ENST00000269228:c.2713C>T	p.Gln905Ter	Likely Pathogenic	Recessive							NPC	HP:0002240,HP:0001744,HP:0002908,HP:0000952,HP:0002910,HP:0003155,HP:0006254,HP:0200084
45917	Single	WGS	ARID1B	Indel	6:157495210GGCAAA>G	ENST00000275248:c.3096_3100delCAAAG	p.Lys1033ArgfsTer32	Likely Pathogenic	Dominant							CSS	HP:0001511,HP:0000776,HP:0030680,HP:0002079,HP:0001999,HP:0002205,HP:0002194
46891	Single	WGS	NEB	SNV	2:g.152410341C>T	ENST00000172853:c.19626+1G>A	NA	Likely Pathogenic	Recessive	NEB	2:152544248C>G	ENST00000172853:c.2416-1G>C	NA	Likely Pathogenic		Nemaline Myopathy 2	HP:0001290,HP:0002835,HP:0000347,HP:0000463
48659	Trio	WGS	GABRA1	SNV	5:g.161317989G>A	ENST00000023897:c.789G>A	p.Met263Ile	Likely Pathogenic	Dominant							Epileptic Encephalopathy, Early Infantile, 19	HP:0012469,HP:0001250,HP:0002376,HP:0000565,HP:0008947
48768	Trio	WGS	PCDH19	SNV	X:g.99662806C>A	ENST00000255531:c.790G>T	p.Asp264Tyr	Likely Pathogenic	Dominant							Epileptic Encephalopathy, Early Infantile, 9	HP:0002104,HP:0001250
48890	Trio	WGS	POLR1C	SNV	6:g.43487171T>C	ENST00000304004:c.242T>C	p.Leu81Pro	Likely Pathogenic	Recessive	POLR1C	6:43487520G>A	ENST00000304004:c.326G>A	p.Arg109His	Likely Pathogenic		Leukodystrophy, Hypomyelinating, 11	HP:0001657,HP:0005184,HP:0002092,HP:0001385,HP:0011451,HP:0011968,HP:0002835,HP:0001508
48975	Trio	WGS	PHEX	SNV	X:g.22208578C>T	ENST00000379374:c.1604C>T	p.Thr535Met	Likely Pathogenic	X-Linked							Hypophosphatemic Rickets, X-Linked Dominant	HP:0001680,HP:0012304,HP:0011682,HP:0011670,HP:0011668,HP:0001655,HP:0000062,HP:0000033,HP:0000808,HP:0000041,HP:0000960,HP:0003468,HP:0006380,HP:0001511,HP:0000347,HP:0001873,HP:0001905
49043	Single	WGS	TPM1	SNV	15:g.63353108G>A	ENST00000267996:c.533G>A	p.Arg178His	Likely Pathogenic	Dominant							Cardiomyopathy, Dilated, 1Y	HP:0001789,HP:0001791,HP:0001698,HP:0001711,HP:0030682,HP:0001646,HP:0012304,HP:0011649,HP:0001708,HP:0009937,HP:0000494,HP:0011247,HP:0010946,HP:0004719,HP:0001873,HP:0001942
204560	Trio	WGS	JAG1	Large Del	20:g.10471400_13459333del	NA	NA	Pathogenic	Dominant-De Novo							AWS	HP:0002908,HP:0001396,HP:0004971,HP:0001643,HP:0001942,HP:0001947,HP:0001508
217279	Trio	WGS	RET	SNV	10:g.43619168C>T	ENST00000340058:c.2851C>T	p.Pro951Ser	Likely Pathogenic	Dominant-De Novo							Hirschsprung Disease, Protection Against	HP:0005241,HP:0011286,HP:0011464
218152	Trio	WGS	RYR2	SNV	1:g.237632425C>T	ENST00000360064:c.1646C>T	p.Ala549Val	Likely Pathogenic	Dominant-De Novo							Ventricular Tachycardia, Catecholaminergic Polymorphic, 1, With Or Without Atrial Dysfunction And/Or Dilated Cardiomyopathy	HP:0001663,HP:0005147,HP:0001897,HP:0012432
218210	Trio	WGS	NF1	Indel	17:g.29653118CT>C	ENST00000356175:c.5118delT	p.Val1707PhefsTer3	Likely Pathogenic	Dominant	MYBPC3	11:47355113AC>A	ENST00000256993:c.3184delG	p.Val1062LeufsTer13	Likely Pathogenic	Dominant	Neurofibromatosis, Type I; Left Ventricular Noncompaction 10	HP:0030680,HP:0004935,HP:0000967,HP:0000938,HP:0002788,HP:0002742,HP:0002726
219381	Trio	WGS	KCNQ2	SNV	20:g.62071003A>G	ENST00000344425:c.875T>C	p.Leu292Pro	Likely Pathogenic	Dominant-De Novo							Epileptic Encephalopathy, Early Infantile, 7	HP:0200134,HP:0010851,HP:0002123,HP:0011451
219954	Trio	WGS	ANTXR2	Indel	4:g.80905985A>AG	ENST00000295465:c.1073dupC	p.Ala359CysfsTer13	Pathogenic	Recessive							Hyaline Fibromatosis Syndrome	HP:0009062,HP:0008947,HP:0003324,HP:0001265,HP:0001284,HP:0006380,HP:0000737,HP:0012531,HP:0002926,HP:0001901
221152	Trio	WGS	ERCC6	SNV	10:g.50708686C>T	ENST00000355832:c.1583G>A	p.Gly528Glu	Pathogenic	Recessive	ERCC6	10:50747005C>A	ENST00000355832:c.-15+3G>T	NA	Likely Pathogenic		Cockayne Syndrome B	HP:0000639,HP:0001272,HP:0001337,HP:0001385,HP:0002352
223426	Trio	WGS	ABCC8	SNV	11:g.17434263G>A	ENST00000302539:c.2506C>T	p.Arg836Ter	Pathogenic	Dominant							Islet Cell Hyperplasia	HP:0000842,HP:0001943,HP:0001520,HP:0200128,HP:0002643
223449	Trio	WGS	TANGO2	SNV, Large Del	22:g.20049207G>A	ENST00000327374:c.605+1G>A	NA	Pathogenic	Recessive	TANGO2	22:g.20028937_20057143del	NA	NA	Pathogenic		Metabolic Crises, Recurrent, With Rhabdomyolysis, Cardiac Arrhythmias, And Neurodegeneration	HP:0011342,HP:0002384,HP:0001273,HP:0002500,HP:0011203,HP:0006846,HP:0003128,HP:0001946,HP:0001943,HP:0003236,HP:0002910,HP:0001649,HP:0003116,HP:0005162,HP:0001657,HP:0001627,HP:0000565,HP:0002925,HP:0011196
227733	Trio	WGS	ACTG2	SNV	2:g.74140753G>A	ENST00000345517:c.593G>A	p.Gly198Asp	Pathogenic	Dominant-De Novo							Visceral Myopathy	HP:0000021,HP:0004388,HP:0100771,HP:0002566,HP:0002144,HP:0000072
228211	Trio	WGS	ATM	SNV	11:g.108164206T>C	ENST00000278616:c.4776+2T>C	NA	Pathogenic	Dominant							Ataxia-Telangiectasia	HP:0005549,HP:0002719,HP:0000230,HP:0002110,HP:0001711
228972	Trio	WGS	FOXP3	SNV	X:g.49121122C>A	ENST00000376197:c.-23+1G>T	NA	Pathogenic	X-Linked							Immunodysregulation, Polyendocrinopathy, And Enteropathy, X-Linked	HP:0000857,HP:0100651,HP:0030057
235721	Trio	WGS	KMT2D	Indel	12:g.49444140TTTC>T	ENST00000301067:c.3228_3230delGAA	p.Lys1077del	Likely Pathogenic	Dominant							Kabuki Syndrome 1	HP:0005164,HP:0001642,HP:0030732,HP:0001667,HP:0011648,HP:0000470,HP:0005989,HP:0000278,HP:0001873,HP:0000836
237983	Trio	WGS	CHD7	SNV	8:g.61774803C>T	ENST00000423902:c.7879C>T	p.Arg2627Ter	Pathogenic	Dominant-De Novo							Charge Syndrome	HP:0010775,HP:0010296,HP:0002835,HP:0001601,HP:0001607,HP:0000126
238088	Single	WGS	FOXF1	SNV	16:g.86544363G>T	ENST00000262426:c.188G>T	p.Ser63Ile	Likely Pathogenic	Dominant							Alveolar Capillary Dysplasia With Misalignment Of Pulmonary Veins	HP:0002092,HP:0002878,HP:0001667
238158	Single	WGS	GBA	SNV	1:g.155205043A>G	ENST00000327247:c.1448T>C	p.Leu483Pro	Pathogenic	Recessive	GBA	1:155204988G>C	ENST00000327247:c.1503C>G	p.Asn501Lys	Likely Pathogenic		Gaucher Disease, Type Iii	HP:0001433,HP:0004356
238321	Trio	WGS	ASL	SNV	7:g.65552766C>T	ENST00000304874:c.706C>T	p.Arg236Trp	Pathogenic	Recessive							Argininosuccinic Aciduria	HP:0001987
238633	Trio	WGS	ZEB2	Indel	2:g.145161633GC>G	ENST00000303660:c.656delG	p.Gly219AlafsTer5	Pathogenic	Dominant-De Novo							Mowat-Wilson Syndrome	HP:0002251,HP:0001290,HP:0008743,HP:0001273,HP:0001642,HP:0001629,HP:0000288
239521	Single	WGS	PIEZO1	Indel	16:g.88782090C>CCTCCAG	ENST00000301015:c.7483_7488dupCTGGAG	p.Leu2495_Glu2496dup	Pathogenic	Dominant							DHS	HP:0001903,HP:0005518,HP:0001923
240011	Trio	WGS	TSC2	Indel	16:g.2108829TTC>T	ENST00000219476:c.935_936delTC	p.Leu312GlnfsTer25	Pathogenic	Dominant-De Novo							Tuberous Sclerosis 2	HP:0100544,HP:0100012,HP:0009716
240101	Trio	WGS	APOB	SNV	2:g.21251356G>A	ENST00000233242:c.1672C>T	p.Arg558Ter	Pathogenic	Dominant							FHBL	HP:0002910,HP:0001395,HP:0001397,HP:0001403,HP:0005543
240204	Trio	WGS	NIPBL	SNV	5:g.37052603C>T	ENST00000282516:c.7198C>T		Likely Pathogenic	Dominant-De Novo							BDLS	HP:0011974,HP:0001876,HP:0005101,HP:0000202,HP:0012176
244102	Single	WES	MAGEL2	Large Del	15:g.23684685_26108259del	NA	NA	Pathogenic	Dominant							Prader-Willi Syndrome	HP:0001262,HP:0001290,HP:0000308,HP:0001511
244636	Single	WGS	ACVRL1	SNV	12:g.52314615C>T	ENST00000388922:c.1450C>T	p.Arg484Trp	Pathogenic	Dominant							Pulmonary Arterial Hypertension, Hereditary Hemorrhagic Telangiectasia-Related	HP:0002092
244741	Single	WGS	G6PC3	Indel	17:g.42148539T>TC	ENST00000269097:c.207dupC	p.Ile70HisfsTer17	Pathogenic	Recessive	G6PC3	17:42148526GAGTGGCTCAACCTCATCTTCA>G	ENST00000269097:c.199_218+1delCTCAACCT...	NA	Pathogenic		Neutropenia, Severe Congenital, 4, Autosomal Recessive	HP:0001875,HP:0002092,HP:0007457,HP:0001631,HP:0040187,HP:0001873,HP:0008689,HP:0001250
245242	Duo	WGS	FGFR2	SNV	10:g.123279677G>C	ENST00000457416:c.755C>G	p.Ser252Trp	Pathogenic	Dominant	HDAC8	X:71792553T>C	ENST00000373573:c.59A>G	p.Tyr20Cys	Likely Pathogenic	Recessive	Apert Syndrome; Cornelia De Lange Syndrome	HP:0001627
245811	TRio	WGS	PYGM	SNV	11:g.64514745GT>G	ENST00000164139:c.2262delA	p.Lys754AsnfsTer49	Pathogenic	Recessive	PYGM	11:64519438G>A	ENST00000164139:c.1726C>T	p.Arg576Ter	Pathogenic		Glycogen Storage Disease V	HP:0002315,HP:0003201
246146	Single	WGS	HCN1	Large Dup	5:g213101_46270700dup	NA	NA	Pathogenic	Dominant							Trisomy 5P	HP:0002076,HP:0001946
246411	Single	WES	CHD7	Indel	8:g.61778453T>TG	ENST00000423902:c.8962dupG	p.Asp2988GlyfsTer2	Pathogenic	Dominant							Charge Syndrome	HP:0010775,HP:0011598,HP:0011648,HP:0001601,HP:0004887,HP:0004755,HP:0000126,HP:0000369,HP:0000308,HP:0005989
247150	Trio	WGS	TH	SNV	11:g.2189760G>A	ENST00000381178:c.541C>T	p.Gln181Ter	Pathogenic	Recessive	TH	11:2188668G>C	ENST00000381178:c.785C>G	p.Thr262Ser	Likely Pathogenic		Segawa Syndrome, Autosomal Recessive	HP:0007166,HP:0000975,HP:0010553,HP:0002376,HP:0009062
247311	Trio	WGS	STAT1	SNV	2:g.191851647G>A	ENST00000361099:c.1154C>T	p.Thr385Met	Pathogenic	Dominant-De Novo							Immunodeficiency 31C	HP:0002721,HP:0002180,HP:0002015,HP:0002783,HP:0002728
248182	Single	WGS	SDHA	SNV	5:g.254507G>T	ENST00000264932:c.1795-1G>T	NA	Pathogenic	Recessive	SDHA	5:226021T>G	ENST00000264932:c.480T>G	p.Phe160Leu	Likely Pathogenic		Mitochondrial Complex Ii Deficiency	HP:0001638,HP:0001328,HP:0006528,HP:0000938,HP:0002352
248678	Single	WGS	FANCC	Large Del	9:g97998556_98009092del	NA	NA	Pathogenic	Dominant							Fanconi Anemia, Complementation Group C	HP:0005528,HP:0000252,HP:0009778,HP:0000957,HP:0000365,HP:0001508
249018	Single	WGS	ZEB2	SNV	2:g.145157457G>A	ENST00000558170:c.1297C>T	p.Gln433Ter	Pathogenic	Dominant							Mowat-Wilson Syndrome	HP:0001627,HP:0000589,HP:0010945,HP:0009765
249059	Single	WGS	CYBB	SNV	X:g.37668945G>A	ENST00000378588:c.1586+1G>A	NA	Pathogenic	Dominant							Granulomatous Disease, Chronic, X-Linked	HP:0001399,HP:0002608,HP:0004322
249119	Single	WGS	NODAL	SNV	10:g.72195109C>T	ENST00000287139:c.824G>A	p.Arg275His	Likely Pathogenic	Dominant							Situs Inversus Viscerum	HP:0031054,HP:0011622,HP:0011623,HP:0006705,HP:0011648,HP:0001655,HP:0005184,HP:0005989,HP:0000252
249937	Trio	WGS	AIRE	SNV	21:g.45713043TC>T	ENST00000291582:c.1265delC	p.Pro422LeufsTer58	Pathogenic	Recessive	AIRE	21:45706575T>C	ENST00000291582:c.268T>C	p.Tyr90His	Likely Pathogenic		Autoimmune Polyendocrine Syndrome, Type I, With Or Without Reversible Metaphyseal Dysplasia	HP:0000829,HP:0002901
249938	Trio	WGS	TMEM67	SNV	8:g.94777642G>A	ENST00000453321:c.515G>A	p.Arg172Gln	Likely Pathogenic	Recessive	TMEM67	8:g.94805495C>T	ENST00000453321:c.1645C>T	p.Arg549Cys	Likely Pathogenic		Joubert Syndrome 6	HP:0002099,HP:0001394,HP:0000964,HP:0003193,HP:0000657,HP:0001744,HP:0001508
250332	Single	WGS	TSC1	SNV	9:g.135781467G>A	ENST00000298552:c.1498C>T	p.Arg500Ter	Pathogenic	Dominant							TSC1	HP:0009716,HP:0003550,HP:0009729,HP:0000107
250578	Duo	WGS	KRAS	SNV	12:g.25380280C>G	ENST00000256078:c.178G>C	p.Gly60Arg	Pathogenic	Dominant							Cardiofaciocutaneous Syndrome 2	HP:0001627,HP:0011675,HP:0002566,HP:0006528,HP:0006934,HP:0000271
250796	Trio	WGS	COL4A4	SNV	2:g.227872828G>A	ENST00000396625:c.4715C>T	p.Pro1572Leu	Likely Pathogenic	Dominant							Alport Syndrome 2, Autosomal Recessive	HP:0001903,HP:0000123,HP:0012115,HP:0031123,HP:0003256
250996	Single	WGS	ALDH7A1	SNV	5:g.125887751C>G	ENST00000409134:c.1279G>C	p.Glu427Gln	Pathogenic	Recessive	ALDH7A1	5:125919689G>A	ENST00000409134:c.328C>T	p.Arg110Ter	Pathogenic		Epilepsy, Pyridoxine-Dependent	HP:0001250,HP:0002133,HP:0003128,HP:0002119
251355	Duo	WGS	TRIP11	Large Del	14:g.84783523_96907490del	NA	NA	Pathogenic	Dominant							Chromosome 14Q31.2Q32.2 Syndrome	HP:0000822,HP:0004902,HP:0001789,HP:0003256
252268	Trio	WGS	FANCA	Indel, Large Del	16:g.89807249GAGA>G	ENST00000389301:c.3788_3790delTCT	p.Phe1263del	Pathogenic	Recessive	FANCA	16:g.89847864_89863349del	NA	NA	Pathogenic		Estren-Dameshek Variant Of Fanconi Anemia	HP:0001873,HP:0001875,HP:0001915
252788	Single	WGS	OPA1	SNV	3:g.193335075G>A	ENST00000361908:c.556+1G>A	NA	Pathogenic	Dominant							Optic Atrophy 1	HP:0001250,HP:0003265
253509	Single	WGS	KDM6A	Indel	X:g.44938491TC>T	ENST00000377967:c.3042delC	p.Thr1015LeufsTer33	Pathogenic	Dominant							Kabuki Syndrome 2	HP:0000252,HP:0011968,HP:0001257,HP:0002360,HP:0006919,HP:0000717,HP:0001249
253691	Single	WGS	HIRA	Large Del	22:g.18893883_20307516del	NA	NA	Pathogenic	Dominant							DGS	HP:0001680,HP:0004430,HP:0012020
254012	Trio	WGS	NDUFS3	SNV, Large Del	11:g.47602529G>A	ENST00000263774:c.374G>A	p.Arg125His	Pathogenic	Recessive	NDUFS3	11:g.47605229_47609177del	NA	NA	Pathogenic		Mitochondrial Complex I Deficiency, Nuclear Type 8	HP:0003688,HP:0001332
254026	Trio	WGS	CACNA1A	SNV	19:g.13419008G>C	ENST00000360228:c.1839C>G	p.Ile613Met	Likely Pathogenic	Dominant-De Novo							Episodic Ataxia, Type 2	HP:0001328,HP:0002076,HP:0001337,HP:0002066,HP:0002018,HP:0000657,HP:0001250
254552	Single	WGS	KCNQ2	SNV	20:g.62073848G>C	ENST00000359125:c.727C>G	p.Leu243Val	Likely Pathogenic	Dominant							Epileptic Encephalopathy, Early Infantile, 7	HP:0001250,HP:0200134
254589	Trio	WGS	BTK	Indel	X:g.100615605T>TA	ENST00000308731:c.726dupT	p.Ile243TyrfsTer15	Pathogenic	Dominant-De Novo							Agammaglobulinemia, X-Linked	HP:0001875,HP:0002721,HP:0003256,HP:0004313,HP:0100806
254728	Single	WGS	EPHA4	Large Del	2:g.220309089_224580863del	NA	NA	Pathogenic	Dominant							Pathogenic Deletion In 2Q35Q36.1	HP:0000369,HP:0004467,HP:0000252,HP:0012745,HP:0002719
254744	Single	WGS	SLC25A19	SNV	17:g.73269721C>G	ENST00000402418:c.775-1G>C	NA	Pathogenic	Recessive	SLC25A19	17:73274406G>A	ENST00000402418:c.470C>T	p.Thr157Met	Likely Pathogenic		Microcephaly, Amish Type	HP:0000639,HP:0000252,HP:0001274,HP:0001298,HP:0003128
254861	Duo	WGS	MECP2	Indel	X:g.153296525C>CG	ENST00000453960:c.789dupC	p.Gly264ArgfsTer7	Pathogenic	Recessive							Encephalopathy, Neonatal Severe, Due To Mecp2 Mutations	HP:0001319,HP:0040213
255391	Trio	WGS	ABCC8	SNV	11:g.17415261T>G	ENST00000389817:c.4591A>C	p.Thr1531Pro	Likely Pathogenic	Dominant							Diabetes Mellitus, Transient Neonatal, 2	HP:0001943
256282	Single	WGS	RELA	SNV	11:g.65422473T>G	ENST00000406246:c.1034-2A>C	NA	Likely Pathogenic	Dominant							Mucocutaneous Ulceration, Chronic	HP:0001954,HP:0002037,HP:0012649
256804	Trio	WGS	SHOC2	SNV	10:g.112724120A>G	ENST00000369452:c.4A>G	p.Ser2Gly	Pathogenic	Dominant-De Novo							Tosti Syndrome	HP:0001028,HP:0001263,HP:0001290,HP:0001508,HP:0001642,HP:0002558
256943	Single	WES	MAGEL2	Large Del	15:g.22833478-28566610_del	NA	NA	Pathogenic	Dominant							Prader-Willi Syndrome	HP:0001319
256944	Trio	WGS	NALCN	SNV	13:g.101828691T>C	ENST00000251127:c.1799A>G	p.Asp600Gly	Likely Pathogenic	Dominant-De Novo							Congenital Contractures Of The Limbs And Face, Hypotonia, And Developmental Delay	HP:0001263,HP:0005684
257434	Single	WGS	COL2A1	Indel	12:g.48372167T>TGG	ENST00000380518:c.2908_2909dupCC	p.Pro971HisfsTer58	Pathogenic	Dominant							Stickler Syndrome, Type I	HP:0000201,HP:0002098
257875	Single	WGS	PTPN11	SNV	12:g.112926890A>G	ENST00000351677:c.1510A>G	p.Met504Val	Pathogenic	Dominant							Noonan Syndrome	HP:0000028,HP:0000358,HP:0001629,HP:0006610
259268	Trio	WGS	G6PD	SNV	X:g.153760605G>A	ENST00000393562:c.1450C>T	p.Arg484Cys	Pathogenic	NULL							Favism, Susceptibility To	HP:0000709,HP:0010473
259685	Trio	WES	TYROBP	Large Dup	19:g.23158251_33502767dup	NA	NA	Pathogenic	Dominant-De Novo							Partial Trisomy 19P12.Q13.11	HP:0002248,HP:0002020,HP:0200048,HP:0002904
259844	Single	WGS	TAZ	SNV	X:g.153649275C>T	ENST00000299328:c.811C>T	p.Gln271Ter	Pathogenic	Recessive							Barth Syndrome	HP:0001508,HP:0001640,HP:0001644,HP:0002098
260219	Duo	WGS	PMS2	SNV	7:g.6031675A>T	ENST00000265849:c.917T>A	p.Val306Glu	Likely Pathogenic	Recessive							Mismatch Repair Cancer Syndrome	HP:0000957,HP:0000997,HP:0001909,HP:0006721
260323	Trio	WGS	NDUFV1	SNV	11:g.67376033T>C	ENST00000322776:c.166T>C	p.Ser56Pro	Likely Pathogenic	Recessive	NDUFV1	11:67376979G>A	ENST00000322776:c.383G>A	p.Arg128Gln	Likely Pathogenic		Mitochondrial Complex I Deficiency, Nuclear Type 4	HP:0001518,HP:0001942,HP:0002878,HP:0003128
260427	Single	WES	NSD1	SNV	5:g.176696730C>T	ENST00000439151:c.5431C>T	p.Arg1811Ter	Pathogenic	Dominant							Cerebral Gigantism	HP:0000842,HP:0000846,HP:0001943
260428	Single	WES	ZEB2	Indel	2:g.145157366AC>A	ENST00000558170:c.1387delG	p.Val463PhefsTer24	Pathogenic	Dominant							Mowat-Wilson Syndrome	HP:0001636,HP:0002251
261354	Trio	WGS	FGFR3	SNV	4:g.1803571C>G	ENST00000340107:c.749C>G	p.Pro250Arg	Pathogenic	Dominant							Muenke Syndrome	HP:0001250
261645	Trio	WGS	COL2A1	SNV	12:g.48367201A>G	ENST00000380518:c.4453T>C	p.Cys1485Arg	Likely Pathogenic	Dominant							Spondyloepiphyseal Dysplasia Congenita	HP:0002656
262455	Single	WES	SOX9	SNV	17:g.70117728G>T	ENST00000245479:c.196G>T	p.Glu66Ter	Pathogenic	Dominant							Campomelic Dysplasia With Autosomal Sex Reversal	HP:0002779,HP:0002780,HP:0002652,HP:0000126,HP:0001776,HP:0002878,HP:0001385
262779	Single	WGS	GNPTAB	Indel	12:g.102158734CTA>C	ENST00000299314:c.1959_1960delTA	p.Pro655HisfsTer12	Likely Pathogenic	Recessive	GNPTAB	12:102158917T>A	ENST00000299314:c.1778A>T	p.Asn593Ile	Likely Pathogenic		Mucolipidosis Iii Alpha/Beta	HP:0002656
263148	Single	WGS	COMP	SNV	19:g.18896949C>T	ENST00000222271:c.1315G>A	p.Asp439Asn	Likely Pathogenic	Dominant							Epiphyseal Dysplasia, Multiple, 1	HP:0002656
263150	Trio	WGS	PUS3	SNV	11:g.125766179T>C	ENST00000227474:c.1A>G	p.Met1?	Likely Pathogenic	Recessive							Mental Retardation, Autosomal Recessive 55	HP:0000252,HP:0001003,HP:0001249,HP:0002667,HP:0004322
264921	Trio	WGS	F13A1	Indel	6:g.6182326CAT>C	ENST00000264870:c.1352_1353delAT	p.His451ArgfsTer29	Likely Pathogenic	Recessive							Factor Xiii, A Subunit, Deficiency Of	HP:0001048,HP:0001269
265212	Single	WGS	COL12A1	SNV	6:g.75811720G>A	ENST00000322507:c.8464C>T	p.Arg2822Ter	Pathogenic	Recessive							Bethlem Myopathy 2	HP:0001166,HP:0040081,HP:0002804,HP:0001639,HP:0000347,HP:0003701
265213	Trio	WGS	ABCC2	SNV	10:g.101594275ATT>A	ENST00000370449:c.3399_3400delTT	p.Tyr1134CysfsTer43	Pathogenic	Recessive	ABCC2	10:101604086G>A	ENST00000370449:c.3851G>A	p.Trp1284Ter	Pathogenic		Dubin-Johnson Syndrome	HP:0000047,HP:0001719,HP:0001746,HP:0005345,HP:0011640,HP:0011681,HP:0030853
265772	Trio	WGS	BCKDHB	SNV	6:g.80837279T>G	ENST00000320393:c.212T>G	p.Met71Arg	Likely Pathogenic	Recessive	BCKDHB	6:80877461C>T	ENST00000320393:c.410C>T	p.Ala137Val	Likely Pathogenic		Maple Syrup Urine Disease	HP:0001640,HP:0001875,HP:0002910,HP:0001629
265887	Trio	WGS	PPP2R5D	SNV	6:g.42975003G>A	ENST00000485511:c.592G>A	p.Glu198Lys	Pathogenic	Dominant-De Novo							Mental Retardation, Autosomal Dominant 35	HP:0000256,HP:0001250,HP:0001290
266485	Trio	WGS	SLC26A2	SNV	5:g.149359991C>T	ENST00000286298:c.835C>T	p.Arg279Trp	Pathogenic	Recessive							Epiphyseal Dysplasia, Multiple, 4	HP:0002656
266517	Trio	WGS	INS	SNV	11:g.2182176G>C	ENST00000397262:c.26C>G	p.Pro9Arg	Likely Pathogenic	Dominant-De Novo							Diabetes Mellitus, Permanent Neonatal, With Neurologic Features	HP:0000126,HP:0000857,HP:0003074
266523	Duo	WGS	BTRC	Large Dup	10:g.102941001_103430600dup	NA	NA	Pathogenic	Dominant							SHFM3	HP:0200054,HP:0004058
266563	Duo	WGS	EBF3	SNV	10:g.131761759C>A	ENST00000368648:c.163G>T	p.Glu55Ter	Pathogenic	Dominant							Hypotonia, Ataxia, And Delayed Development Syndrome	HP:0000325,HP:0012448,HP:0001251
266700	Trio	WGS	TAB2	Large Del	6:g.144951601_150260400del	NA	NA	Pathogenic	Dominant-De Novo							Chromosome 6Q25-Q25 Deletion Syndrome	HP:0200116,HP:0002878,HP:0001627,HP:0012304,HP:0004401,HP:0001629
267148	Trio	WES	ARVCF	Supernumerary Chr	22:g.17038511-20307516_dup; 11:g.116691508_126432828_dup	NA	NA	Pathogenic	Dominant-De Novo							Emanuel Syndrome	HP:0001627,HP:0000104,HP:0000054,HP:0002779,HP:0000201
267167	Trio	WGS	FOXC1	Indel	6:g.1611272GGCCGCCAGCCCCCGCCCGC>G	ENST00000380874:c.599_617delAGCCCCCGCC...	p.Gln200ArgfsTer109	Pathogenic	Dominant							Axenfeld-Rieger Syndrome, Type 3	HP:0002656,HP:0001776,HP:0030431
267307	Single	WES	NOTCH1	Indel	9:g.139410027AT>A	ENST00000277541:c.1810delA	p.Ile604SerfsTer27	Likely Pathogenic	Dominant							Bicuspid Aortic Valve	HP:0004383,HP:0002878
267392	Single	WES	HIRA	Large Del	22:g.18893883_21562619 del	NA	NA	Pathogenic	Dominant							DGS	HP:0002013,HP:0000113,HP:0001629
267597	Trio	WGS	HRAS	SNV	11:g.534289C>T	ENST00000451590:c.34G>A	p.Gly12Ser	Pathogenic	Dominant-De Novo							Costello Syndrome	HP:0002643,HP:0001789,HP:0011725
267749	Trio	WGS	COMP	SNV	19:g.18899109G>C	ENST00000222271:c.887C>G	p.Pro296Arg	Likely Pathogenic	Dominant-De Novo							Epiphyseal Dysplasia, Multiple, 1	HP:0002652
268240	Single	WGS	FLT4	SNV	5:g.180043465G>A	ENST00000261937:c.3121C>T	p.Arg1041Trp	Likely Pathogenic	Dominant							Lymphatic Malformation 1	HP:0002104,HP:0001004
268314	Single	WGS	KMT2D	Indel	12:g.49420995AG>A	ENST00000301067:c.14753delC	p.Pro4918LeufsTer77	Pathogenic	Dominant							Kabuki Syndrome 1	HP:0004383,HP:0000175,HP:0008081,HP:0000081,HP:0000193
268712	Single	WGS	COMP	SNV	19:g.18896582G>C	ENST00000222271:c.1569C>G	p.Asn523Lys	Likely Pathogenic	Dominant							Epiphyseal Dysplasia, Multiple, 1	HP:0002654
269173	Single	WGS	COMP	SNV	19:g.18899323A>G	ENST00000222271:c.763T>C	p.Cys255Arg	Likely Pathogenic	Dominant							Epiphyseal Dysplasia, Multiple, 1	HP:0002654,HP:0002652
269922	Trio	WGS	SCN5A	SNV	3:g.38597155G>A	ENST00000413689:c.4534C>T	p.Arg1512Trp	Likely Pathogenic	Recessive							SUNDS	HP:0001250
270106	Trio	WGS	GREB1L	SNV	18:g.19076462C>T	ENST00000580732:c.3194C>T	p.Thr1065Ile	Likely Pathogenic	Dominant							Renal Hypodysplasia/Aplasia 3	HP:0000104,HP:0001642
270908	Single	WES	RET	SNV	10:g.43600486G>T	ENST00000355710:c.712G>T	p.Glu238Ter	Pathogenic	Dominant							Hirschsprung Disease, Protection Against	HP:0001667,HP:0001712,HP:0002251
271068	Trio	WGS	MYLK	SNV	3:g.123359208G>A	ENST00000360304:c.4763C>T	p.Pro1588Leu	Likely Pathogenic	Dominant-De Novo							Aortic Aneurysm, Familial Thoracic 7	HP:0100021,HP:0002597,HP:0001263,HP:0001250,HP:0002140
272585	Single	WGS	KMT2D	Indel	12:g.49442939A>AC	ENST00000301067:c.3968dupG	p.Arg1324Ter	Pathogenic	Dominant							Kabuki Syndrome 1	HP:0000252,HP:0000322,HP:0000369,HP:0001290,HP:0001518,HP:0001629,HP:0001631,HP:0001647,HP:0001792
274935	Trio	WGS	GJB2	SNV	13:g.20763356T>A	ENST00000382844:c.365A>T	p.Lys122Ile	Pathogenic	Dominant							Deafness, Autosomal Dominant 3A	HP:0007359,HP:0008619,HP:0006721,HP:0000252,HP:0001263
279628	Trio	WGS	IRF2BPL	Indel	14:g.77493813TGTTGCTGTTGCTGTTGCGCGGCGGCGGCGGCGGCCGCC>T	ENST00000238647:c.285_322del	p.Ala102ThrfsTer18	Likely Pathogenic	Dominant-De Novo							Neurodevelopmental Disorder With Regression, Abnormal Movements, Loss Of Speech, And Seizures	HP:0000750,HP:0002015,HP:0000252,HP:0001347,HP:0009062
289541	Trio	WGS	LZTR1	SNV	22:g.21343076A>G	ENST00000215739:c.510-2A>G	NA	Likely Pathogenic	Recessive	LZTR1	22:21346110G>A	ENST00000215739:c.985G>A	p.Asp329Asn	Uncertain Significance		Noonan Syndrome 2	HP:0001263,HP:0002376
295097	Single	WGS	HDAC8	SNV	X:g.71715066G>A	ENST00000373573:c.490C>T	p.Arg164Ter	Pathogenic	Dominant							Cornelia De Lange Syndrome 5	HP:0011220,HP:0004209,HP:0000316,HP:0000358,HP:0000455,HP:0000343,HP:0000347,HP:0001508
304059	Trio	WGS	EFHC1	SNV	6:g.52317540G>A	ENST00000371068:c.628G>A	p.Asp210Asn	Pathogenic	Dominant	GABRB3	15:27017614G>A	ENST00000311550:c.175C>T	p.Pro59Ser	Likely Pathogenic	Dominant	Epilepsy, Myoclonic Juvenile;Epileptic Encephalopathy, Early Infantile, 43	HP:0002384,HP:0006852
306313	Single	WGS	PPP2R5D	SNV	6:g.42975043A>C	ENST00000485511:c.632A>C	p.Gln211Pro	Pathogenic	Dominant							Mental Retardation, Autosomal Dominant 35	HP:0007328,HP:0001290,HP:0002079,HP:0001336,HP:0000268,HP:0001332,HP:0001347,HP:0002059
308699	Single	WGS	SLC2A1	SNV	1:g.43393352G>A	ENST00000426263:c.1202C>T	p.Pro401Leu	Likely Pathogenic	Dominant							Glucose Transport Defect, Blood-Brain Barrier	HP:0002076,HP:0001250
352726	Single	WGS	THRA	Large Dup	17:g.32147833_79020944dup	NA	NA	Pathogenic	Dominant							Distal Trisomy 17Q	HP:0000054,HP:0000154,HP:0000233,HP:0000316,HP:0000369,HP:0000455,HP:0000463,HP:0000581,HP:0001320,HP:0000581,HP:0001320,HP:0001830,HP:0001852,HP:0001999,HP:0002119,HP:0003186,HP:0003194,HP:0005280,HP:0006610,HP:0010557,HP:0011039,HP:0011457,HP:0100807
360547	Trio	WGS	FREM1	Large Del	9:g.1_18477200del	NA	NA	Pathogenic	Dominant							Chromosome 9P Deletion Syndrome	HP:0000066,HP:0001518,HP:0001537,HP:0001545,HP:0001943,HP:0005487,HP:0006610
240716	Trio	WGS	NA	NA	NA	NA	NA	NA	NA							Previoulsy Undiagnosed	HP:0002138,HP:0007902,HP:0002408,HP:0002170
243992	Trio	WGS	NA	NA	NA	NA	NA	NA	NA							Previoulsy Undiagnosed	HP:0000776,HP:0004383,HP:0011611,HP:0001629
244799	Single	WGS	SRP54	SNV	14:g.35476556G>A	ENST00000556994:c.323G>A	p.Gly108Glu	Uncertain Significance	Dominant							Previoulsy Undiagnosed	HP:0003125,HP:0001875,HP:0001891,HP:0007018
247963	Trio	WGS	NA	NA	NA	NA	NA	NA	NA							Previoulsy Undiagnosed	HP:0200128,HP:0001719,HP:0001888,HP:0008467
244949	Trio	WGS	STAG2	SNV	X:123184971:C:T	ENST00000218089:c.1018C>T	p.Gln340*	Likely Pathogenic	X-linked Dominant							Previoulsy Undiagnosed	HP:0001396,HP:0040075,HP:0001943
245237	Trio	WGS	GK	SNV	X:g.30726170G>T	ENST00000427190:c.877-1G>T	NA	Uncertain Significance	X-linked Recessive	FANCA	16:g.89836985C>T	ENST00000389301:c.2209G>A	p.Ala737Thr	Uncertain Significance	Recessive	Previoulsy Undiagnosed	HP:0002715
245481	Duo	WGS	NA	NA	NA	NA	NA	NA	NA							Previoulsy Undiagnosed	HP:0011636,HP:0010882,HP:0010954,HP:0001647,HP:0004887
245768	Single	WGS	TSC2	Large Dup	16:g.2132603_2251345dup	NA	NA	Uncertain Significance	Dominant							Previoulsy Undiagnosed	HP:0025169,HP:0025116,HP:0004420,HP:0006265,HP:0011648
246158	Trio	WGS	NA	NA	NA	NA	NA	NA	NA							Previoulsy Undiagnosed	HP:0012446,HP:0011215,HP:0001250
246385	Duo	WGS	NA	NA	NA	NA	NA	NA	NA							Previoulsy Undiagnosed	HP:0200128,HP:0001719,HP:0001888,HP:0008467
247458	Single	WGS	SLC25A24	SNV	1:g.108703864G>C	ENST00000565488:c.450C>G	p.Tyr150Ter	Uncertain Significance	Dominant							Previoulsy Undiagnosed	HP:0006554,HP:0001915,HP:0002960
247963	Trio	WGS	NA	NA	NA	NA	NA	NA	NA							Previoulsy Undiagnosed	HP:0000822,HP:0002098,HP:0011968,HP:0002835,HP:0002104
248675	Single	WGS	NA	NA	NA	NA	NA	NA	NA							Previoulsy Undiagnosed	HP:0006554,HP:0001915,HP:0002960
248893	Trio	WGS	NA	NA	NA	NA	NA	NA	NA							Previoulsy Undiagnosed	HP:0000822,HP:0002098,HP:0011968,HP:0002835,HP:0002104

## Sheet: Table S2
Table S2. Validation cohort case description.
Sources: BCM: Boston Children's Hospital. UTartu: University of Tartu. HA: Hudson Alpha. Ukiel: University of Kiel. TGEN: Translational Genomics Institute
Case	Pedigree	Gene	Mode of Inhertiance	Diagnosis	Assay	Median coverage	WES capture method
Val-1	Single	ACTA1	Autosomal dominant	Nemaline myopathy 3	WES	64	EZ Exome 2.0 (Roche)
Val-2	Single	NEB	Autosomal reccesive	Nemaline myopathy 2	WES	12	EZ Exome 2.0 (Roche)
Val-3	Single	NEB	Autosomal reccesive	Nemaline myopathy 2	WES	19	EZ Exome 2.0 (Roche)
Val-4	Single	LMOD3	Autosomal reccesive	Nemaline myopathy 10	WES	40	EZ Exome 2.0 (Roche)
Val-5	Single	ATP1A3	Autosomal dominant	CAPOS syndrome	WES	46	EZ Exome 2.0 (Roche)
Val-6	Single	NEB	Autosomal reccesive	Nemaline myopathy 2	WES	62	EZ Exome 2.0 (Roche)
Val-7	Single	ACTA1	Autosomal dominant	Nemaline myopathy 3	WES	54	EZ Exome 2.0 (Roche)
Val-8	Single	NEB	Autosomal reccesive	Nemaline myopathy 2	WES	54	EZ Exome 2.0 (Roche)
Val-9	Single	TPM3	Autosomal dominant	Nemaline myopathy 1	WES	16	EZ Exome 2.0 (Roche)
Val-10	Single	KLHL40	Autosomal dominant	Nemaline myopathy 8	WES	63	EZ Exome 2.0 (Roche)
Val-11	Single	TNNT1	Autosomal dominant	Nemaline body myopathy	WES	19	EZ Exome 2.0 (Roche)
Val-12	Trio	SCN2A	Autosomal dominant	Epileptic encephalopathy, early infantile, 11	WES	62	Nextera Rapid Capture Exome Kit-i (Illumina)
Val-13	Duo	ZBTB18	Autosomal dominant	Mental retardation, autosomal dominant 22	WES	50	Nextera Rapid Capture Exome Kit-i (Illumina)
Val-14	Trio	GNAS	Autosomal dominant	Pseudohypoparathyroidism	WES	65	Nextera Rapid Capture Exome Kit-i (Illumina)
Val-15	Trio	SLC2A1	Autosomal dominant	GLUT1 deficiency syndrome-1	WES	88	Nextera Rapid Capture Exome Kit-i (Illumina)
Val-16	Trio	OGT	X-linked reccesive	Mental retardation, x-linked 106	WES	64	Nextera Rapid Capture Exome Kit-i (Illumina)
Val-17	Trio	SHANK3	Autosomal dominant	Phelan-McDermid syndrome	WES	96	Nextera Rapid Capture Exome Kit-i (Illumina)
Val-18	Trio	KCNB1	Autosomal dominant	Epileptic encephalopathy, early infantile, 26	WES	82	Nextera Rapid Capture Exome Kit-i (Illumina)
Val-19	Trio	CYF1P2	Autosomal dominant	Epileptic encephalopathy, early infantile, 65	WES	87	Nextera Rapid Capture Exome Kit-i (Illumina)
Val-20	Duo	ZC4H2	X-linked dominant	Wieacker-Wolff syndrome	WES	71	Nextera Rapid Capture Exome Kit-i (Illumina)
Val-21	Trio	CELSR1	Autosomal reccesive	Novel candidate	WES	90	Nextera Rapid Capture Exome Kit-i (Illumina)
Val-22	Trio	RAB11A	Autosomal dominant	Epileptic encephalopathy (not in OMIM)	WES	82	Nextera Rapid Capture Exome Kit-i (Illumina)
Val-23	Trio	SPG11	Autosomal reccesive	Spastic Paraplegia 11; Charcot-Marie-Tooth Disease	WGS	40	N/A
Val-24	Trio	PACS1	Autosomal dominant	Schuurs-Hoeijmakers syndrome	WGS	43	N/A
Val-25	Single	MYBPC3	Autosomal dominant	Cardiomyopathy, dilated, 1MM; Cardiomyopathy, hypertrophic, 4; Left ventricular noncompaction 10	WGS	31	N/A
Val-26	Single	ALPK1	Autosomal dominant	ROSAH syndrome.	WES	203	Nextera/TruSeq (Illumina)
Val-27	Single	CTLA4	Autosomal dominant	Autoimmune lymphoproliferative syndrome	WES	39	Nextera/TruSeq (Illumina)
Val-28	Single	IL10RA	Autosomal dominant	Inflammatory bowel disease 28	WES	54	Nextera/TruSeq (Illumina)
Val-29	Single	SLC9A3	Autosomal reccesive	congenital secretory diarrhea 8	WES	39	Nextera/TruSeq (Illumina)
Val-30	Single	CTLA4	Autosomal dominant	Autoimmune lymphoproliferative syndrome, type V	WES	44	Nextera/TruSeq (Illumina)
Val-31	Single	HINT1	Autosomal reccesive	Neuromyotonia and axonal neuropathy, autosomal recessive	WES	95	Nextera/TruSeq (Illumina)
Val-32	Single	GUCY2C	Autosomal dominant	Diarrhea 6	WES	52	Nextera/TruSeq (Illumina)
Val-33	Single	XIAP	X-linked reccesive	Lymphoproliferative syndrome, X-linked, 2	WES	37	Nextera/TruSeq (Illumina)
Val-34	Single	SERPINA1	Autosomal reccesive	Alpha-1 antitrypsin deficiency	WES	78	Nextera/TruSeq (Illumina)
Val-35	Single	GUCY2C	Autosomal dominant	Diarrhea 6	WES	43	Nextera/TruSeq (Illumina)
Val-36	Single	GUCY2C	Autosomal dominant	Diarrhea 6	WES	31	Nextera/TruSeq (Illumina)
Val-37	Single	GUCY2C	Autosomal dominant	Diarrhea 6	WES	27	Nextera/TruSeq (Illumina)
Val-38	Trio	SATB2	Autosomal dominant	Glass syndrome	WES	181	SureSelect Human All Exon V6 or CRE V2 (Agilent)
Val-39	Trio	SYNGAP1	Autosomal dominant	Mental retardation, autosomal dominant 5	WES	109	SureSelect Human All Exon V6 or CRE V2 (Agilent)
Val-40	Trio	NEDD4L	Autosomal dominant	Periventricular nodular heterotopia 7	WES	97	SureSelect Human All Exon V6 or CRE V2 (Agilent)
Val-41	Trio	KCNA2	Autosomal dominant	Epileptic encephalopathy, early infantile, 32	WES	118	SureSelect Human All Exon V6 or CRE V2 (Agilent)
Val-42	Trio	CHD7	Autosomal dominant	CHGE syndrome	WES	126	SureSelect Human All Exon V6 or CRE V2 (Agilent)
Val-43	Trio	SYNGAP1	Autosomal dominant	Mental retardation, autosomal dominant 5	WES	106	SureSelect Human All Exon V6 or CRE V2 (Agilent)
Val-44	Duo	WDR45	X-linked dominant	Neurodegeneration with brain iron accumulation 5	WES	101	SureSelect Human All Exon V6 or CRE V2 (Agilent)
Val-45	Single	CASK	X-linked dominant	Mental retardation; FG syndrome 4	WGS	30	N/A
Val-46	Trio	KCNQ2	Autosomal dominant	Epileptic encephalopathy, early infantile, 7; Myokymia; Seizures, benign neonatal	WGS	23	N/A
Val-47	Duo	SMC1A	X-linked dominant	Cornelia de Lange syndrome 2	WES	109	SureSelect Human All Exon V6 or CRE V2 (Agilent)
Val-48	Trio	HNRNPH2	X-linked dominant	Mental retardation, X-linked, syndromic, Bain type	WES	86	SureSelect Human All Exon V6 or CRE V2 (Agilent)
Val-49	Trio	PRMT7	Autosomal reccesive	Short stature, brachydactyly, intellectual developmental disability, and seizures	WES	115	SureSelect Human All Exon V6 or CRE V2 (Agilent)
Val-50	Duo	DEPDC5	Autosomal dominant	Epilepsy, familial focal, with variable foci 1	WES	99	SureSelect Human All Exon V6 or CRE V2 (Agilent)
Val-51	Trio	USP9X	X-linked dominant	Mental retardation, X-linked	WES	109	SureSelect Human All Exon V6 or CRE V2 (Agilent)
Val-52	Trio	SLC52A3	Autosomal reccesive	Brown-Vialetto-Van Laere syndrome 1	WES	141	SureSelect Human All Exon V6 or CRE V2 (Agilent)
Val-53	Single	SCN2A	Autosomal dominant	Epileptic encephalopathy, early infantile, 11	WES	99	SureSelect Human All Exon V6 or CRE V2 (Agilent)
Val-54	Trio	SKIV2L	Autosomal reccesive	Trichohepatoenteric syndrome 2	WES	96	SureSelect Human All Exon V6 or CRE V2 (Agilent)
Val-55	Trio	ARID1B	Autosomal dominant	Coffin-Siris syndrome 1	WES	98	SureSelect Human All Exon V6 or CRE V2 (Agilent)
Val-56	Trio	KAT6B	Autosomal dominant	Genitopatellar syndrome; SBBYSS syndrome	WES	106	SureSelect Human All Exon V6 or CRE V2 (Agilent)
Val-57	Trio	GALNS	Autosomal reccesive	Mycopolysaccharidosis IVA	WES	118	SureSelect Human All Exon V6 or CRE V2 (Agilent)
Val-58	Trio	NSD2	Autosomal dominant	Wolf-Hirschhorn syndrome	WES	105	SureSelect Human All Exon V6 or CRE V2 (Agilent)
Val-59	Trio	NALCN	Autosomal dominant	Congenital contractures of the limbs and face, hypotonia, and developmental delay	WES	103	SureSelect Human All Exon V6 or CRE V2 (Agilent)
Val-60	Trio	AFG3L2 and SPG7	Autosomal dominant	Spinocerebellar ataxia 28 AND Spastic paraplegia	WES	110	SureSelect Human All Exon V6 or CRE V2 (Agilent)

## Sheet: Table S3
Table S3. Ranking performance on digenic cases
Table shows case ID, genes and reported rank by tool for each of the 3 digenic diagnoses in the validation dataset. NR: not reported.
		Ranks
Case	Gene	GEM	Exomiser	PHEVOR
218210	NF1	1	1	1
	MYBPC3	2	NR	12
245242	FGFR2	1	1	1
	HDAC8	2	59	2
304059	EFHC1	1	NR	356
	GABRB3	7	NR	129

## Sheet: Table S4
Table S4. Impact of ClinVar annotations of causal variants in tool performance.
Table cells report the performance metrics for cases where the causal variant was previously reported in ClinVar as pathogenic or likely pathogenic vs. when they are not reported or there are conflicting reports.
Metrics: mean, median true positive gene ranks, number of cases for which the diagnostic gene was not reported by the tool (e.g., false negatives), and for GEM, the median number of candidates in the GEM reports with scores > 0 (“hits”).
Cases with causal SVs were excluded from these analyses.
	GEM				Exomiser						PHEVOR
Class	Mean	Median	FN	Hits		Mean	Median	FN	Hits	Mean		Median	FN	Hits
ClinVar P, LP	1	1	0	10		4	1	12	NA	23		2	0	NA
Not in ClinVar	3	1	0	10		32	5	6	NA	50		6	0	NA

## Sheet: Table S5
Table S5. Ranks and scores for the benchmark cohort
Manually curated HPO terms. Cadiadates: number of gene candidates over the BF threshold, incuding the diagnostic gene. N/A: Algorithm did not ranked disgnostic variant/gene in its ouput.
Case ID	Dx Gene	GEM gene rank	GEM gene score	Candidates BF>1	Candidates BF> 0.69	Candidates BF >0.5	Candidates BF >0	Exomiser rank	Exomiser_Score	Phevor rank	VAAST rank
44670	SCN1A	2	0.2599	1	1	1	4	N/A	N/A	2	378
44671	NPAP1	1	1.4157	2	2	3	6	N/A	N/A	186	N/A
45020	PCDH19	1	1.2269	1	2	2	3	N/A	N/A	N/A	376
45907	NPC1	1	4.1126	2	2	2	8	1	0.9169	1	4
45917	ARID1B	1	3.4785	1	2	2	4	1	0.9974	1	4
46891	NEB	1	2.5817	2	2	5	8	3	0.8826	4	51
48659	GABRA1	1	2.7747	1	2	2	6	1	0.9765	1	57
48768	PCDH19	1	1.5717	1	2	3	6	N/A	N/A	148	37
48890	POLR1C	1	0.6539	0	0	1	6	10	0.7238	3	1
48975	PHEX	8	-0.518	1	1	1	4	19	0.0917	14	2
49043	TPM1	7	-0.091	0	1	1	5	27	0.6832	21	51
204560	JAG1	1	1.2453	1	1	1	3	N/A	N/A	N/A	N/A
217279	RET	1	0.8416	0	1	1	2	1	0.9924	1	32
218152	RYR2	1	0.5225	0	0	1	3	1	0.9771	14	83
218210	NF1	1	3.4071	2	2	4	9	5	0.7496	3	23
219381	KCNQ2	1	1.1199	1	2	3	7	1	0.9941	1	44
219954	ANTXR2	1	2.802	1	1	1	9	3	0.749	3	N/A
221152	ERCC6	1	1.7282	1	1	4	7	1	0.9674	75	6
223426	ABCC8	1	2.897	3	4	4	10	N/A	N/A	208	1
223449	TANGO2	1	1.9619	1	1	2	3	N/A	N/A	121	N/A
227733	ACTG2	1	3.6727	1	2	2	5	1	0.9962	1	33
228211	ATM	1	2.338	0	1	2	5	N/A	N/A	139	114
228972	FOXP3	1	4.2691	2	2	3	6	1	0.9892	1	1
235721	KMT2D	3	0.0891	0	1	1	3	6	0.4281	47	159
237983	CHD7	1	3.8894	3	5	5	7	2	0.9277	1	2
238088	FOXF1	3	0.9628	2	3	4	7	3	0.9465	4	102
238158	GBA	1	2.3624	0	0	0	4	1	0.8637	1	56
238321	ASL	1	2.0476	1	2	2	6	1	0.9959	1	1
238633	ZEB2	1	3.8411	2	3	3	9	1	0.967	1	7
239521	PIEZO1	1	2.5286	1	1	1	2	1	0.9872	2	120
240011	TSC2	1	3.6624	1	2	3	6	1	0.9828	1	6
240101	APOB	1	2.751	1	1	3	5	N/A	N/A	171	2
240204	NIPBL	2	1.2163	2	3	4	9	12	0.5626	3	31
244102	MAGEL2	2	1.0957	1	1	1	1	N/A	N/A	N/A	N/A
244636	ACVRL1	1	2.5157	1	1	3	4	1	0.961	1	33
244741	G6PC3	1	3.2614	1	3	3	7	1	0.9729	1	9
245242	FGFR2	1	3.0779	1	2	3	5	2	0.9981	1	81
245811	PYGM	1	2.9062	2	2	2	5	1	0.9843	1	1
246146	FGF10	1	1.3806	1	1	1	4	151	0.0053	46	N/A
246411	CHD7	1	3.0799	1	2	3	6	1	0.9422	1	9
247150	TH	1	2.8254	1	2	2	4	1	0.9813	1	1
247311	STAT1	1	3.7402	2	2	2	4	1	0.9922	1	30
248182	SDHA	1	1.6954	1	1	3	7	1	0.9483	6	8
248678	FANCC	1	1.1058	1	1	3	4	N/A	N/A	N/A	N/A
249018	ZEB2	1	1.8585	2	2	5	10	1	0.9901	1	2
249059	CYBB	1	0.6423	0	0	2	9	77	0.1816	11	14
249119	NODAL	1	2.7885	1	1	4	6	2	0.861	2	46
249937	AIRE	1	2.9403	1	1	2	6	1	0.9855	1	1
249938	TMEM67	1	1.6857	1	2	2	6	1	0.9652	1	4
250332	TSC1	1	4.1171	1	1	2	4	1	0.9864	1	1
250578	KRAS	1	2.853	4	6	7	12	1	0.9132	1	45
250796	COL4A4	40	-1.281	0	0	2	6	N/A	N/A	259	579
250996	ALDH7A1	1	2.1293	1	3	5	8	1	0.9964	2	20
251355	CALM1	2	0.9291	0	2	2	6	69	0.015	13	N/A
252268	FANCA	1	2.2514	1	1	1	6	N/A	N/A	145	89
252788	OPA1	1	2.9084	4	4	5	8	3	0.7892	1	9
253509	KDM6A	1	3.6513	1	2	2	7	4	0.9092	1	21
253691	DGCR6	1	1.6731	4	4	4	7	N/A	N/A	N/A	N/A
254012	NDUFS3	2	1.9763	2	3	3	5	N/A	N/A	162	71
254026	CACNA1A	1	2.9595	2	2	2	8	1	0.9924	3	75
254552	KCNQ2	1	3.0342	1	1	2	4	1	0.9981	3	289
254589	BTK	1	3.0335	2	2	3	4	1	0.9949	115	N/A
254728	PAX3	2	1.4878	2	4	6	10	N/A	N/A	259	N/A
254744	SLC25A19	1	2.8508	1	3	4	12	1	0.992	3	16
254861	MECP2	1	2.6075	1	1	1	6	1	0.9112	1	15
255391	ABCC8	3	0.4351	0	0	2	5	N/A	N/A	25	139
256282	RELA	1	3.2657	2	3	3	6	1	0.9101	5	27
256804	SHOC2	1	2.3951	3	6	6	11	1	0.9445	1	26
256943	NDN	1	1.6223	1	1	2	2	N/A	N/A	N/A	N/A
256944	NALCN	1	2.931	5	6	9	12	1	0.9815	6	17
257434	COL2A1	1	4.0633	1	2	2	4	1	0.9841	1	4
257875	PTPN11	1	2.7196	1	1	2	9	1	0.9902	1	531
259268	G6PD	1	1.3485	1	1	1	4	N/A	N/A	65	N/A
259685	TYROBP	1	1.4578	2	2	2	2	N/A	N/A	N/A	N/A
259844	TAZ	1	4.0657	1	2	2	4	1	0.9859	1	3
260219	PMS2	1	1.9607	3	3	3	8	1	0.9814	1	17
260323	NDUFV1	1	2.5818	2	2	2	5	1	0.9893	1	6
260427	NSD1	1	2.8208	2	2	2	2	1	0.9726	1	3
260428	ZEB2	1	3.6158	2	2	3	4	1	0.9757	1	10
261354	FGFR3	1	2.6197	1	2	3	11	N/A	N/A	19	103
261645	COL2A1	2	1.025	2	2	2	4	N/A	N/A	113	148
262455	SOX9	1	3.4946	2	3	3	6	1	0.9725	1	2
262779	GNPTAB	2	0.0657	0	1	1	4	1	0.8157	12	12
263148	COMP	1	3.9225	1	1	2	3	1	0.989	1	76
263150	PUS3	1	3.8273	2	3	3	5	4	0.749	2	3
264921	F13A1	1	2.7467	2	2	2	3	2	0.7492	12	3
265212	COL12A1	1	2.9356	0	1	2	7	48	0.4915	1	6
265213	ABCC2	1	2.4947	1	1	2	5	3	0.749	3	1
265772	BCKDHB	1	0.71	0	1	1	4	1	0.8924	8	4
265887	PPP2R5D	1	1.3266	1	2	5	11	1	0.9981	1	13
266485	SLC26A2	1	4.0117	1	1	1	1	1	0.9981	1	10
266517	INS	1	3.793	1	1	2	4	4	0.4345	1	6
266523	BTRC	3	1.3728	2	2	2	7	N/A	N/A	N/A	N/A
266563	EBF3	1	4.0082	1	3	5	8	1	0.9931	3	1
266700	TAB2	1	1.4397	1	2	2	9	N/A	N/A	N/A	N/A
267148	CDON	1	1.5357	2	2	2	3	N/A	N/A	35	N/A
267167	FOXC1	1	2.2838	1	2	4	5	N/A	N/A	191	29
267307	NOTCH1	1	2.6356	1	2	2	3	1	0.9734	1	9
267392	DGCR6	1	1.8075	1	2	4	5	147	0.001	334	N/A
267597	HRAS	1	3.3212	1	1	1	2	1	0.8819	1	10
267749	COMP	1	3.5471	1	1	1	5	1	0.9625	2	20
268240	FLT4	1	3.2549	2	3	4	8	2	0.9962	4	38
268314	KMT2D	1	3.7112	1	2	3	5	1	0.9849	1	66
268712	COMP	1	2.9807	1	1	1	4	1	0.8013	1	81
269173	COMP	1	3.3554	1	1	1	3	1	0.8348	5	123
269922	SCN5A	15	-0.632	3	4	4	5	N/A	N/A	42	52
270106	GREB1L	1	2.5812	1	1	1	2	N/A	N/A	70	137
270908	RET	1	3.7523	2	3	3	4	1	0.9954	1	2
271068	MYLK	1	2.3763	1	4	4	7	1	0.9949	4	30
272585	KMT2D	1	3.6822	2	3	4	7	1	0.9708	2	63
274935	GJB2	1	1.6317	2	4	4	8	N/A	N/A	23	88
279628	IRF2BPL	1	3.3222	1	1	2	2	1	0.8646	2	14
289541	LZTR1	13	-0.383	1	2	4	9	9	0.3347	16	3
295097	HDAC8	1	4.1258	1	1	3	8	1	0.9941	1	1
304059	EFHC1	1	1.1333	1	1	1	5	N/A	N/A	720	169
306313	PPP2R5D	3	0.928	2	3	3	6	50	0.5431	6	52
308699	SLC2A1	2	1.2502	2	4	5	9	1	0.9973	1	63
352726	THRA	1	0.9936	0	2	2	10	N/A	N/A	N/A	N/A
360547	FREM1	1	1.3485	3	3	4	7	N/A	N/A	N/A	N/A

## Sheet: Table S6
Table S6. Raw scores and ranks for algorithms
HPO terms extracted by CNLP
Case ID	Dx Gene	GEM gene rank	GEM gene score	Candidates BF>1	Candidates BF> 0.69	Candidates BF >0.5	Candidates BF >0	Exomiser rank	Exomiser_Score	Phevor rank
44670	SCN1A	4	0.0429	1	1	1	4	N/A	N/A	5
44671	NPAP1	1	1.4157	2	2	3	6	N/A	N/A	186
45020	PCDH19	1	1.1493	1	1	2	4	N/A	N/A	N/A
45907	NPC1	1	4.0444	4	6	7	13	1	0.81	7
45917	ARID1B	1	3.4446	3	4	6	6	2	0.78	1
46891	NEB	1	3.5736	2	4	7	16	1	0.87	2
48659	GABRA1	1	2.9307	2	5	7	11	6	0.74	2
48768	PCDH19	1	1.4774	1	1	1	5	N/A	N/A	115
48890	POLR1C	1	0.7092	0	1	2	10	10	0.72	2
48975	PHEX	2	0.7074	1	2	3	6	19	0.09	6
49043	TPM1	4	0.7809	1	5	8	14	25	0.68	19
204560	JAG1	2	1.2125	2	2	4	12	N/A	N/A	N/A
217279	RET	2	0.8662	1	2	3	8	1	0.87	1
218152	RYR2	1	0.5225	0	0	1	3	1	0.98	14
218210	NF1	1	3.5816	4	7	9	17	1	0.91	1
219381	KCNQ2	1	1.0632	2	2	4	10	1	0.95	1
219954	ANTXR2	1	3.1783	1	6	8	12	2	0.75	2
221152	ERCC6	1	1.7046	1	1	3	10	1	0.83	20
223426	ABCC8	1	2.7442	3	8	9	15	N/A	N/A	163
223449	TANGO2	1	2.131	1	2	2	6	N/A	N/A	119
227733	ACTG2	1	3.7991	2	3	3	6	1	0.96	1
228211	ATM	1	2.4681	1	5	6	12	N/A	N/A	129
228972	FOXP3	1	4.3197	1	3	7	16	1	0.95	2
235721	KMT2D	2	0.7384	0	2	3	5	6	0.46	14
237983	CHD7	1	3.9767	2	3	5	15	1	0.85	1
238088	FOXF1	3	1.1633	5	7	8	15	2	0.84	7
238158	GBA	1	2.6772	0	1	3	7	1	0.94	1
238321	ASL	1	1.7772	4	5	7	13	2	0.89	1
238633	ZEB2	1	3.9672	2	3	4	11	1	0.92	1
239521	PIEZO1	1	2.6698	3	4	4	6	1	0.92	12
240011	TSC2	1	3.8024	2	5	8	20	1	0.98	1
240101	APOB	1	2.7842	3	4	6	14	N/A	N/A	247
240204	NIPBL	2	1.5117	3	6	8	9	12	0.59	2
244102	MAGEL2	1	1.2808	1	1	2	5	N/A	N/A	N/A
244636	ACVRL1	1	2.5797	3	3	3	9	1	0.76	1
244741	G6PC3	1	3.3932	2	3	3	12	2	0.92	3
245242	FGFR2	1	2.8902	2	2	3	7	1	0.9	1
245811	PYGM	1	3.1368	1	3	5	9	1	0.94	2
246146	HCN1	1	1.2022	2	2	3	14	165	0.01	92
246411	CHD7	1	3.2989	3	5	5	10	1	0.94	2
247150	TH	1	2.9618	2	2	2	11	1	0.78	4
247311	STAT1	1	3.4183	1	2	3	11	2	0.82	3
248182	SDHA	2	1.836	4	4	5	17	1	0.87	1
248678	FANCC	1	1.1424	1	3	4	9	N/A	N/A	N/A
249018	ZEB2	1	1.8795	2	5	5	13	3	0.86	2
249059	CYBB	1	1.8162	1	2	2	6	71	0.23	3
249119	NODAL	1	3.0287	1	1	2	6	4	0.8	2
249937	AIRE	1	2.866	2	2	2	10	2	0.79	4
249938	TMEM67	1	1.7165	3	4	5	15	1	0.81	2
250332	TSC1	1	4.2567	1	2	3	7	1	0.99	1
250578	KRAS	1	2.8012	3	5	9	17	2	0.83	1
250796	COL4A4	29	-0.61	2	2	5	16	N/A	N/A	252
250996	ALDH7A1	1	1.8583	1	3	5	12	4	0.75	10
251355	TRIP11	4	0.583	1	3	4	10	73	0.01	17
252268	FANCA	1	2.2957	4	4	5	10	N/A	N/A	91
252788	OPA1	1	2.7404	3	4	6	7	2	0.76	3
253509	KDM6A	1	3.708	1	2	2	11	3	0.75	1
253691	HIRA	1	1.7305	4	5	6	10	N/A	N/A	N/A
254012	NDUFS3	1	1.5593	3	4	4	10	N/A	N/A	156
254026	CACNA1A	1	3.1137	2	2	4	13	2	0.8	3
254552	KCNQ2	1	2.815	1	2	4	5	1	0.9	5
254589	BTK	1	3.4478	1	4	5	10	1	0.85	109
254728	EPHA4	2	1.4574	2	4	7	14	N/A	N/A	189
254744	SLC25A19	1	2.8719	3	4	7	14	7	0.75	3
254861	MECP2	1	3.4976	2	2	4	15	1	0.78	1
255391	ABCC8	8	0.4129	0	3	5	11	N/A	N/A	9
256282	RELA	1	3.6422	3	5	7	15	2	0.82	7
256804	SHOC2	1	2.4475	3	7	9	17	1	0.75	2
256943	MAGEL2	1	1.6379	1	3	4	5	N/A	N/A	N/A
256944	NALCN	1	2.9876	3	6	9	18	1	0.75	1
257434	COL2A1	1	4.2197	4	10	11	16	1	0.98	1
257875	PTPN11	1	2.7339	1	2	3	12	2	0.79	1
259268	G6PD	1	1.8646	3	5	8	12	N/A	N/A	49
259685	TYROBP	1	1.3154	2	2	2	4	N/A	N/A	N/A
259844	TAZ	1	4.1332	2	2	2	10	1	0.84	4
260219	PMS2	1	1.9539	3	6	7	16	1	0.89	2
260323	NDUFV1	1	2.5959	2	3	5	14	1	0.78	1
260427	NSD1	1	3.6088	3	4	6	8	8	0.75	2
260428	ZEB2	1	3.664	2	4	6	8	1	0.92	1
261354	FGFR3	1	2.5813	1	3	4	16	N/A	N/A	3
261645	COL2A1	2	1.0555	2	4	6	10	N/A	N/A	47
262455	SOX9	1	3.664	2	3	4	12	1	0.96	1
262779	GNPTAB	3	1.2122	4	5	8	17	15	0.74	1
263148	COMP	1	3.9465	2	3	4	10	1	0.85	1
263150	PUS3	1	3.5336	1	2	3	8	4	0.75	2
264921	F13A1	1	3.4097	2	4	4	13	3	0.75	7
265212	COL12A1	1	3.0604	1	3	7	14	112	0.18	2
265213	ABCC2	1	3.0175	2	2	4	18	4	0.75	1
265772	BCKDHB	1	1.9846	1	3	4	7	1	0.94	1
265887	PPP2R5D	1	1.2885	2	3	7	18	1	0.75	1
266485	SLC26A2	1	4.0641	1	2	3	9	1	0.95	1
266517	INS	1	3.9033	2	3	4	8	6	0.41	1
266523	BTRC	1	2.0521	3	4	8	14	N/A	N/A	N/A
266563	EBF3	1	4.0641	4	5	6	11	2	0.77	3
266700	TAB2	1	1.3066	1	3	3	13	N/A	N/A	N/A
267148	ARVCF	1	1.8667	2	2	3	5	N/A	N/A	25
267167	FOXC1	1	2.8674	4	5	5	7	N/A	N/A	212
267307	NOTCH1	1	3.4921	1	3	3	7	1	0.88	1
267392	HIRA	1	2.0517	1	3	3	6	143	0	300
267597	HRAS	1	3.4826	1	2	2	2	1	0.93	1
267749	COMP	1	3.9126	1	2	3	10	1	0.96	1
268240	FLT4	1	3.5829	2	5	5	9	1	0.91	1
268314	KMT2D	1	3.685	2	3	3	8	2	0.85	1
268712	COMP	1	4.118	2	2	3	7	1	0.91	1
269173	COMP	1	3.7008	2	4	4	5	1	0.97	1
269922	SCN5A	12	0.1149	2	4	6	12	N/A	N/A	23
270106	GREB1L	1	2.3865	1	2	2	6	N/A	N/A	68
270908	RET	1	3.8119	2	4	4	8	2	0.92	1
271068	MYLK	1	2.4403	1	4	5	7	1	0.81	1
272585	KMT2D	1	3.8059	2	4	7	9	2	0.79	1
274935	GJB2	1	1.765	3	5	6	11	N/A	N/A	8
279628	IRF2BPL	1	3.3417	1	3	3	5	4	0.75	3
289541	LZTR1	1	1.7941	2	5	5	12	14	0.16	3
295097	HDAC8	1	4.0717	2	2	5	13	2	0.9	1
304059	EFHC1	1	1.8087	1	2	2	6	N/A	N/A	356
306313	PPP2R5D	3	1.2627	4	4	4	10	42	0.5	6
308699	SLC2A1	2	1.4564	2	3	7	10	1	0.79	1
352726	THRA	1	0.9936	0	2	2	10	N/A	N/A	N/A
360547	FREM1	1	1.3485	3	3	4	7	N/A	N/A	N/A

## Sheet: Table S7
Table S7. Raw scores and ranks for algorithms
Trios and duos analyzes as single proband cases
Case ID	Dx Gene	GEM gene rank	GEM gene score	Candidates BF>1	Candidates BF> 0.69	Candidates BF >0.5	Candidates BF >0	Exomiser rank	Exomiser_Score	Phevor rank
44670	SCN1A	2	0.4084	1	1	1	4	552	0.14	59
44671	NPAP1	1	1.4125	2	2	3	5	293	0.06	996
45020	PCDH19	1	1.225	1	2	2	3	N/A	N/A	5
48659	GABRA1	1	2.7751	1	2	2	7	5	0.98	310
48768	PCDH19	1	1.7202	1	3	3	6	N/A	N/A	3329
48890	POLR1C	1	0.6495	0	0	1	6	12	0.76	603
48975	PHEX	9	-0.731	1	1	2	4	N/A	N/A	7
204560	JAG1	1	1.2442	1	1	1	3	276	0.14	8538
217279	RET	1	0.8351	0	1	1	1	1	1	1956
218152	RYR2	1	0.5074	0	0	1	3	1	0.98	3100
218210	NF1	1	3.4035	2	2	5	10	N/A	N/A	4065
219381	KCNQ2	1	1.1191	1	2	3	9	1	0.99	554
219954	ANTXR2	1	2.7987	1	1	3	6	N/A	N/A	102
221152	ERCC6	1	1.728	1	2	4	8	6	0.98	N/A
223426	ABCC8	1	3.0452	3	4	4	10	1200	0.01	1184
223449	TANGO2	1	1.9577	1	1	2	3	346	0.08	2212
227733	ACTG2	1	3.6704	1	2	2	5	1	1	1239
228211	ATM	1	2.4801	0	1	2	4	18	0.81	2
228972	FOXP3	1	4.2665	2	2	2	6	1	0.99	10
235721	KMT2D	8	-0.263	1	1	1	5	N/A	N/A	10033
237983	CHD7	1	3.7853	4	5	5	7	3	0.93	1
238321	ASL	1	2.0606	1	2	2	5	1	1	1838
238633	ZEB2	1	3.8325	2	3	3	9	1	0.97	1623
240011	TSC2	1	3.6054	1	2	3	6	1	0.98	1642
240101	APOB	1	2.8299	1	1	2	4	316	0.18	100
240204	NIPBL	2	1.2171	2	4	5	11	N/A	N/A	590
245242	FGFR2	1	3.0782	1	2	3	5	2	1	18
245811	PYGM	1	2.9029	1	1	1	4	1	0.98	6
247150	TH	1	2.8292	1	2	2	3	1	0.98	1
247311	STAT1	1	3.7406	1	1	1	4	1	0.99	5142
249937	AIRE	1	3.0002	1	2	2	6	1	0.99	N/A
249938	TMEM67	1	1.6839	1	2	2	9	2	0.97	1
250578	KRAS	1	2.8529	4	6	7	12	7	0.91	3
250796	COL4A4	34	-1.143	0	2	3	7	252	0.19	33
251355	CALM1	2	0.9312	1	2	2	6	457	0.03	116
252268	FANCA	1	2.0777	0	0	0	5	39	0.78	1
254012	NDUFS3	2	2.0134	2	2	2	4	2	0.9	1172
254026	CACNA1A	1	2.9288	2	2	2	9	1	0.99	1
254589	BTK	1	3.0208	1	2	2	4	1	0.99	1
254861	MECP2	1	2.6056	1	1	1	5	1	0.91	222
255391	ABCC8	2	0.5813	0	1	3	5	3	1	6
256804	SHOC2	1	2.3854	2	5	6	9	3	0.94	618
256944	NALCN	2	2.9254	5	7	8	13	1	0.98	100
259268	G6PD	1	1.3487	1	1	1	5	N/A	N/A	633
260219	PMS2	1	1.9664	3	3	4	8	1	0.99	49
260323	NDUFV1	1	2.5786	1	1	1	4	1	0.99	3
261354	FGFR3	1	2.7652	1	2	4	12	609	0.05	109
261645	COL2A1	2	1.1651	2	2	2	4	N/A	N/A	1393
263150	PUS3	1	3.8166	1	1	1	1	N/A	N/A	801
264921	F13A1	1	2.7459	1	1	1	2	N/A	N/A	940
265213	ABCC2	1	2.4856	1	2	3	7	N/A	N/A	391
265772	BCKDHB	1	0.7157	0	1	2	4	4	0.89	687
265887	PPP2R5D	1	1.3184	1	2	5	12	1	1	2642
266485	SLC26A2	1	4.0086	1	1	1	1	1	1	11
266517	INS	1	3.7878	1	1	1	3	20	0.77	1998
266523	BTRC	15	-0.528	1	1	1	5	88	0.07	42
266700	TAB2	2	0.9083	0	2	3	11	N/A	N/A	11697
267148	ROBO4	9	-2.037	0	0	0	1	N/A	N/A	512
267167	FOXC1	1	2.4275	2	2	4	6	N/A	N/A	945
267597	HRAS	1	3.3174	1	1	1	2	14	0.88	10288
267749	COMP	1	3.5494	1	1	2	5	12	0.96	11068
269922	SCN5A	13	-0.535	3	4	4	6	N/A	N/A	115
270106	GREB1L	1	2.7348	1	1	1	2	213	0.35	19
271068	MYLK	1	2.3685	3	4	4	7	1	0.99	3418
274935	GJB2	1	1.7856	2	4	4	8	N/A	N/A	14356
279628	IRF2BPL	1	3.2885	1	1	2	3	4	0.86	13576
289541	LZTR1	14	-0.384	1	3	4	9	27	0.9	1250
304059	EFHC1	1	1.2887	1	1	1	6	N/A	N/A	14200

## Sheet: Table S8
Table S8. Raw scores and ranks for algorithms
HPO trems extracted by CNLP, then randomized to cases with each cases getting the same number of terms that originally had, but randomly selected (weighted for term frequency) from the pool of all terms used for all cases.
Case ID	Dx Gene	GEM gene rank	GEM gene score	Candidates BF>1	Candidates BF> 0.69	Candidates BF >0.5	Candidates BF >0	Exomiser rank	Exomiser_Score	Phevor rank
44670	SCN1A	10	-0.624	1	2	2	3	N/A	N/A	13
44671	UBE3A	1	1.3506	2	2	2	3	N/A	N/A	395
45020	PCDH19	1	0.9723	0	1	2	3	N/A	N/A	N/A
45907	NPC1	1	3.5539	6	7	7	10	7	0.75	18
45917	ARID1B	1	3.4927	2	3	4	6	2	0.82	1
46891	NEB	1	3.0436	2	4	6	12	13	0.75	9
48659	GABRA1	1	2.216	2	3	5	13	5	0.7	4
48768	PCDH19	1	0.8617	0	1	1	4	N/A	N/A	254
48890	POLR1C	2	0.7679	0	2	2	4	10	0.71	2
48975	PHEX	2	0.6117	1	1	2	7	19	0.14	6
49043	TPM1	10	-0.047	1	2	3	9	24	0.67	23
204560	JAG1	2	0.9008	0	3	4	8	N/A	N/A	N/A
217279	RET	1	0.4811	0	0	0	6	7	0.57	2
218152	RYR2	9	-0.481	0	0	1	5	2	0.78	46
218210	NF1	1	3.6568	5	8	10	14	1	0.81	1
219381	KCNQ2	4	0.4151	1	2	3	11	21	0.75	7
219954	ANTXR2	1	2.8633	1	5	6	12	4	0.75	2
221152	ERCC6	1	1.6422	1	2	4	12	23	0.74	69
223426	ABCC8	1	2.4433	4	6	10	17	N/A	N/A	249
223449	TANGO2	1	1.9163	1	2	3	6	N/A	N/A	182
227733	ACTG2	1	2.4974	1	2	4	6	3	0.75	13
228211	ATM	1	2.0659	2	5	6	12	N/A	N/A	151
228972	FOXP3	1	3.3511	2	4	5	17	2	0.8	10
235721	KMT2D	2	0.7515	0	2	3	7	4	0.57	11
237983	CHD7	1	3.9018	3	3	5	13	1	0.89	1
238088	FOXF1	10	0.1858	1	5	5	16	26	0.54	28
238158	GBA	1	2.3913	0	1	3	7	2	0.82	1
238321	ASL	2	1.4275	3	5	5	11	7	0.73	4
238633	ZEB2	1	3.4958	2	2	4	7	2	0.75	3
239521	PIEZO1	1	2.1722	1	4	5	6	9	0.75	31
240011	TSC2	1	3.4098	2	4	7	15	1	0.91	1
240101	APOB	1	2.2488	1	2	5	12	N/A	N/A	271
240204	NIPBL	2	1.4441	4	4	7	10	12	0.67	2
244102	MAGEL2	2	1.003	1	2	3	5	N/A	N/A	N/A
244636	ACVRL1	1	2.0019	3	3	4	12	1	0.75	6
244741	G6PC3	1	3.09	1	3	3	7	2	0.76	7
245242	FGFR2	1	2.808	2	2	3	7	1	0.92	1
245811	PYGM	1	1.568	1	1	1	4	1	0.75	7
246146	HCN1	2	1.1889	2	3	3	13	166	0.01	81
246411	CHD7	1	2.8441	2	3	3	7	1	0.87	3
247150	TH	1	2.9343	1	2	3	8	3	0.75	5
247311	STAT1	1	2.9929	1	2	2	11	3	0.78	5
248182	SDHA	2	1.7417	3	3	5	19	5	0.75	2
248678	FANCC	1	1.0642	1	3	4	9	N/A	N/A	N/A
249018	ZEB2	1	1.6912	2	2	3	10	4	0.75	4
249059	CYBB	1	1.2564	1	1	3	10	73	0.2	6
249119	NODAL	1	2.2228	1	1	1	6	5	0.75	13
249937	AIRE	1	2.2514	3	4	5	9	4	0.75	5
249938	TMEM67	1	1.5779	4	5	6	12	11	0.75	3
250332	TSC1	1	3.7813	1	3	4	6	2	0.85	1
250578	KRAS	1	2.737	3	6	7	13	1	0.85	1
250796	COL4A4	49	-1.987	2	3	4	14	N/A	N/A	387
250996	ALDH7A1	1	1.712	2	4	6	13	5	0.75	15
251355	TRIP11	2	0.7689	1	3	5	10	73	0.02	21
252268	FANCA	1	1.6119	2	4	4	8	N/A	N/A	224
252788	OPA1	1	2.7787	3	4	7	9	1	0.75	6
253509	KDM6A	1	3.7106	1	2	2	6	2	0.75	2
253691	HIRA	1	1.7461	3	4	4	9	N/A	N/A	N/A
254012	NDUFS3	1	1.4747	2	4	6	8	N/A	N/A	186
254026	CACNA1A	1	2.5869	1	3	5	9	6	0.75	10
254552	KCNQ2	1	2.4414	1	1	2	5	6	0.75	10
254589	BTK	1	3.2067	3	5	6	8	3	0.75	197
254728	SPEG	2	1.4943	3	5	5	12	N/A	N/A	166
254744	SLC25A19	1	2.8213	1	4	6	15	11	0.75	7
254861	MECP2	1	3.4047	2	3	3	15	4	0.75	1
255391	ABCC8	10	0.0859	1	3	4	10	N/A	N/A	35
256282	RELA	1	3.2834	3	4	6	12	2	0.82	10
256804	SHOC2	1	2.3578	4	5	8	16	1	0.75	2
256943	UBE3A	1	1.396	1	1	1	6	N/A	N/A	N/A
256944	NALCN	2	2.8896	4	5	7	16	2	0.75	2
257434	COL2A1	1	3.7437	1	1	5	15	1	0.81	1
257875	PTPN11	1	2.4399	2	3	5	17	2	0.75	7
259268	G6PD	1	1.4394	4	6	6	11	N/A	N/A	68
259685	MAG	1	1.3061	1	1	1	2	N/A	N/A	N/A
259844	TAZ	1	3.9449	2	4	4	9	2	0.78	5
260219	PMS2	2	0.6961	0	2	3	12	11	0.7	14
260323	NDUFV1	1	2.0585	2	3	5	14	2	0.75	2
260427	NSD1	1	3.5702	3	3	3	10	3	0.75	2
260428	ZEB2	1	3.458	1	2	3	6	1	0.78	3
261354	FGFR3	1	2.4841	1	2	5	10	N/A	N/A	4
261645	COL2A1	5	0.5447	2	4	5	11	N/A	N/A	64
262455	SOX9	1	3.4098	2	3	4	10	2	0.75	2
262779	GNPTAB	3	1.1638	4	5	5	14	2	0.85	1
263148	COMP	1	2.9385	1	4	4	10	5	0.75	20
263150	PUS3	1	3.3178	2	2	2	7	4	0.75	2
264921	F13A1	1	3.5929	1	3	4	12	1	0.78	6
265212	COL12A1	1	2.6605	2	3	5	12	108	0.18	5
265213	ABCC2	1	1.9278	1	1	3	20	3	0.75	4
265772	BCKDHB	1	1.7904	2	3	4	8	5	0.75	3
265887	PPP2R5D	3	0.5567	0	1	4	13	1	0.75	3
266485	SLC26A2	1	3.726	1	2	2	10	1	0.91	1
266517	INS	1	3.3186	2	2	2	7	6	0.41	1
266523	BTRC	4	0.8738	3	3	5	12	N/A	N/A	N/A
266563	EBF3	1	3.0772	1	4	8	12	7	0.75	20
266700	EPM2A	1	1.2398	1	3	4	9	N/A	N/A	N/A
267148	ARVCF	1	1.8418	2	2	2	4	N/A	N/A	30
267167	FOXC1	1	2.7952	1	3	4	6	N/A	N/A	212
267307	NOTCH1	1	2.8009	3	3	3	5	1	0.8	2
267392	HIRA	1	1.8763	3	3	3	5	145	0	314
267597	HRAS	1	3.3256	1	2	3	6	1	0.75	1
267749	COMP	1	2.6514	1	2	3	11	1	0.75	7
268240	FLT4	1	2.7545	1	2	4	9	1	0.75	5
268314	KMT2D	1	3.8106	2	4	4	8	1	0.79	2
268712	COMP	1	3.2759	2	2	3	7	12	0.75	24
269173	COMP	1	2.399	1	2	3	8	5	0.75	40
269922	SCN5A	32	-1.292	3	4	5	9	N/A	N/A	82
270106	GREB1L	1	1.6495	1	1	1	3	N/A	N/A	85
270908	RET	1	3.4041	2	3	3	7	3	0.77	1
271068	MYLK	1	2.3118	3	4	5	7	2	0.77	1
272585	KMT2D	1	3.6796	2	3	3	10	1	0.82	1
274935	GJB2	1	1.8573	3	6	7	10	N/A	N/A	8
279628	IRF2BPL	1	3.251	1	1	1	5	3	0.75	3
289541	LZTR1	1	2.3546	3	3	6	15	14	0.15	3
295097	HDAC8	1	4.0349	2	3	4	10	1	0.8	1
304059	EFHC1	1	1.1811	1	1	2	5	N/A	N/A	468
306313	PPP2R5D	4	0.7706	2	5	5	9	42	0.51	19
308699	SLC2A1	1	0.9702	0	3	3	9	18	0.67	2
352726	THRA	5	0.4049	0	2	3	14	N/A	N/A	N/A
360547	FREM1	4	0.9482	3	4	4	6	N/A	N/A	N/A

## Sheet: Table S9
Table S9. Raw scores and ranks for algorithms
GEM analysis rmeoving ClinVar variant annotations. HPO terms extracted by CNLP.
Case ID	Dx Gene	GEM gene rank	GEM gene score	Candidates BF>1	Candidates BF> 0.69	Candidates BF >0.5	Candidates BF >0
44670	SCN1A	4	0.0033	1	1	1	4
44671	NPAP1	1	1.4929	2	2	3	5
45020	PCDH19	1	1.2115	1	1	2	6
45907	NPC1	1	1.7419	4	8	9	13
45917	ARID1B	1	1.1816	1	3	5	5
46891	NEB	2	1.3113	2	5	7	16
48659	GABRA1	6	0.5172	1	3	6	9
48768	PCDH19	1	1.5979	1	1	2	6
48890	POLR1C	13	-0.435	0	0	2	7
48975	PHEX	1	0.6124	0	0	1	4
49043	TPM1	5	0.7105	0	5	6	12
204560	JAG1	2	1.1373	2	2	4	10
217279	RET	2	0.8878	1	2	3	9
218152	RYR2	1	0.5547	0	0	1	3
218210	NF1	1	1.1921	3	5	10	17
219381	KCNQ2	1	1.1808	2	3	5	10
219954	ANTXR2	4	0.8027	1	5	7	13
221152	ERCC6	2	0.6143	0	0	4	13
223426	ABCC8	10	0.3732	1	4	7	12
223449	TANGO2	1	1.0726	2	2	3	7
227733	ACTG2	1	1.5844	2	2	2	6
228211	ATM	11	0.0919	1	2	6	11
228972	FOXP3	1	2.001	1	3	5	14
235721	KMT2D	1	0.8889	0	3	5	11
237983	CHD7	1	1.6886	2	3	4	13
238088	FOXF1	3	1.1461	5	7	8	14
238158	GBA	5	0.3957	0	1	3	10
238321	ASL	1	1.871	3	3	5	16
238633	ZEB2	1	1.7224	2	3	5	12
239521	PIEZO1	4	0.4001	2	2	3	6
240011	TSC2	1	1.3656	1	2	4	14
240101	APOB	8	0.2465	0	3	5	12
240204	NIPBL	2	1.506	2	5	6	7
244102	MAGEL2	1	1.1255	1	1	2	6
244636	ACVRL1	7	0.3723	2	2	4	10
244741	G6PC3	1	1.2141	3	3	3	15
245242	FGFR2	3	0.6286	1	2	3	9
245811	PYGM	1	0.8359	0	3	4	9
246146	HCN1	2	0.8289	1	2	4	17
246411	CHD7	2	1.0292	2	4	4	9
247150	TH	2	0.7579	1	2	3	12
247311	STAT1	1	1.1549	1	2	3	15
248182	SDHA	3	0.7034	2	3	3	16
248678	FANCC	1	1.4791	1	3	4	9
249018	ZEB2	1	1.8213	2	4	5	11
249059	CYBB	1	1.8089	1	2	2	6
249119	NODAL	1	0.7706	0	1	4	5
249937	AIRE	2	0.5387	1	1	2	9
249938	TMEM67	4	0.5412	2	2	4	14
250332	TSC1	1	2.0413	1	2	3	6
250578	KRAS	9	0.558	3	5	9	17
250796	COL4A4	27	-0.63	1	2	5	14
250996	ALDH7A1	19	-0.44	0	2	4	13
251355	TRIP11	4	0.7008	1	4	4	15
252268	FANCA	11	-0.343	2	2	3	6
252788	OPA1	6	0.3601	1	2	5	7
253509	KDM6A	1	1.4603	1	1	2	11
253691	DGCR6	1	1.7726	3	4	6	11
254012	NDUFS3	17	-0.58	1	3	5	11
254026	CACNA1A	1	0.922	0	2	6	13
254552	KCNQ2	4	0.5615	0	2	4	5
254589	BTK	1	1.2183	2	3	5	10
254728	PAX3	1	1.3131	3	6	7	13
254744	SLC25A19	6	0.5579	2	4	6	13
254861	MECP2	1	1.1411	2	2	3	14
255391	ABCC8	7	0.5458	1	4	7	15
256282	RELA	1	1.2095	2	3	3	13
256804	SHOC2	13	0.1674	1	4	6	14
256943	MAGEL2	1	1.7276	2	3	4	6
256944	NALCN	5	0.6697	2	4	8	18
257434	COL2A1	1	2.0514	5	9	11	17
257875	PTPN11	4	0.5146	0	1	4	12
259268	G6PD	19	-0.4	2	4	7	11
259685	KMT2B	1	0.8275	0	1	2	3
259844	TAZ	1	1.8485	2	2	3	14
260219	PMS2	1	2.0018	3	6	8	16
260323	NDUFV1	7	0.3568	1	3	4	16
260427	NSD1	1	1.3806	2	2	4	8
260428	ZEB2	1	1.3906	2	4	5	9
261354	FGFR3	5	0.4214	1	3	3	18
261645	COL2A1	2	1.0293	2	3	5	9
262455	SOX9	1	1.466	1	3	3	11
262779	GNPTAB	17	0.0907	3	4	8	18
263148	COMP	1	1.6439	1	2	3	9
263150	PUS3	1	1.2319	1	1	2	8
264921	F13A1	1	1.1144	2	4	5	14
265212	COL12A1	4	0.7827	1	5	7	17
265213	ABCC2	2	0.6125	0	1	4	17
265772	BCKDHB	2	0.7605	0	2	4	7
265887	PPP2R5D	1	1.3168	1	4	6	17
266485	SLC26A2	1	1.8669	1	2	4	13
266517	INS	1	1.8076	1	2	4	10
266523	BTRC	17	-0.468	2	2	4	11
266563	EBF3	1	1.7266	4	5	5	10
266700	TAB2	3	0.9583	1	3	6	14
267148	ARVCF	1	1.8247	2	2	3	4
267167	FOXC1	5	0.6473	3	4	5	8
267307	NOTCH1	1	1.2118	1	3	3	7
267392	HIRA	1	1.9061	1	1	1	3
267597	HRAS	1	1.3262	2	2	2	5
267749	COMP	1	1.6567	1	2	4	10
268240	FLT4	2	1.167	2	3	5	7
268314	KMT2D	1	1.4016	2	3	4	9
268712	COMP	1	1.6411	2	2	2	5
269173	COMP	1	1.2902	1	2	3	6
269922	SCN5A	11	0.0255	1	2	4	11
270106	GREB1L	6	0.0579	0	1	1	6
270908	RET	1	1.5464	1	3	3	8
271068	MYLK	7	0.0998	1	3	4	8
272585	KMT2D	1	1.7297	4	7	8	12
274935	GJB2	20	-0.577	2	3	4	10
279628	IRF2BPL	1	1.0127	1	2	2	6
289541	LZTR1	19	-0.659	0	5	5	13
295097	HDAC8	1	1.8871	2	6	8	11
304059	EFHC1	12	-0.544	0	1	1	5
306313	PPP2R5D	2	1.2944	3	3	3	10
308699	SLC2A1	1	1.435	1	2	5	10

## Sheet: Table S10
Table S10. Ranks and scores for the validation cohort
Sources: BCM: Boston Children's Hospital. UTartu: University of Tartu. HA: Hudson Alpha. Ukiel: University of Kiel. TGEN: Translational Genomics Institute
Source-Case	Pedigree	Sex	Gene	Mode of Inhertiance	VAAST rank	Phevor rank	GEM Rank	GEM Score
BCH-1	Single	Male	ACTA1	Autosomal dominant	36	1	1	1.06
BCH-2	Single	Female	NEB	Autosomal reccesive	61	2	1	3.16
BCH-3	Single	Female	NEB	Autosomal reccesive	53	3	1	3.1
BCH-4	Single	Male	LMOD3	Autosomal reccesive	5	1	1	3.64
BCH-5	Single	Male	ATP1A3	Autosomal dominant	60	6	1	2.53
BCH-6	Single	Female	NEB	Autosomal reccesive	88	6	1	3.93
BCH-7	Single	Male	ACTA1	Autosomal dominant	134	11	1	0.72
BCH-8	Single	Female	NEB	Autosomal reccesive	90	12	1	1.19
BCH-9	Single	Female	TPM3	Autosomal dominant	1	1	1	0.76
BCH-10	Single	Female	KLHL40	Autosomal dominant	7	1	1	0.61
BCH-11	Single	Female	TNNT1	Autosomal dominant	11	1	1	-0.05
UTartu-1	Trio	Female	SCN2A	Autosomal dominant	29	9	1	0.45
UTartu-2	Duo	Female	ZBTB18	Autosomal dominant	15	1	1	1.39
UTartu-3	Trio	Female	GNAS	Autosomal dominant	5	1	1	3.17
UTartu-4	Trio	Female	SLC2A1	Autosomal dominant	NA	NA	1	3.56
UTartu-5	Trio	Male	OGT	X-linked reccesive	1	3	1	3.46
UTartu-6	Trio	Female	SHANK3	Autosomal dominant	1	1	1	3.61
UTartu-7	Trio	Female	KCNB1	Autosomal dominant	20	1	1	3.74
UTartu-8	Trio	Female	CYF1P2	Autosomal dominant	41	14	2	0.19
UTartu-9	Duo	Female	ZC4H2	X-linked dominant	41	2	1	0.71
UTartu-10	Trio	Male	CELSR1	Autosomal reccesive	10	12	NA	<0
UTartu-11	Trio	Male	RAB11A	Autosomal dominant	29	22	NA	<0
HA-1	Trio	Male	SPG11	Autosomal reccesive	2	1	1	3.12
HA-2	Trio	Male	PACS1	Autosomal dominant	8	1	1	3.38
HA-3	Single	Female	MYBPC3	Autosomal dominant	11	1	1	3.89
UKiel-1	Single	Female	ALPK1	Autosomal dominant	93	103	2	0.91
UKiel-2	Single	Female	CTLA4	Autosomal dominant	59	1	1	1.74
UKiel-3	Single	Male	IL10RA	Autosomal dominant	35	1	1	2.47
UKiel-4	Single	Female	SLC9A3	Autosomal reccesive	10	1	1	2.95
UKiel-5	Single	Male	CTLA4	Autosomal dominant	2	1	1	4.27
UKiel-6	Single	Male	HINT1	Autosomal reccesive	14	1	1	4.39
UKiel-7	Single	Female	GUCY2C	Autosomal dominant	167	16	1	0.32
UKiel-8	Single	Male	XIAP	X-linked reccesive	1	1	2	0.81
UKiel-9	Single	Male	SERPINA1	Autosomal reccesive	56	12	1	2.66
UKiel-10	Single	Female	GUCY2C	Autosomal dominant	89	7	3	0.08
UKiel-11	Single	Female	GUCY2C	Autosomal dominant	149	28	10	-0.27
UKiel-12	Single	Male	GUCY2C	Autosomal dominant	154	21	12	0.06
TGEN-1	Trio	Female	SATB2	Autosomal dominant	1	1	1	0.75
TGEN-2	Trio	Female	SYNGAP1	Autosomal dominant	7	1	1	1.06
TGEN-3	Trio	Female	NEDD4L	Autosomal dominant	53	1	1	1.08
TGEN-4	Trio	Female	KCNA2	Autosomal dominant	8	1	2	0.87
TGEN-5	Trio	Female	CHD7	Autosomal dominant	1	1	2	1.18
TGEN-6	Trio	Female	SYNGAP1	Autosomal dominant	1	1	1	1.34
TGEN-7	Duo	Female	WDR45	X-linked dominant	21	4	1	3.58
TGEN-8	Single	Male	CASK	X-linked dominant	169	3	1	3.33
TGEN-9	Trio	Female	KCNQ2	Autosomal dominant	12	4	1	2.36
TGEN-10	Duo	Female	SMC1A	X-linked dominant	1	1	1	3.88
TGEN-11	Trio	Male	HNRNPH2	X-linked dominant	2	1	1	3.29
TGEN-12	Trio	Female	PRMT7	Autosomal reccesive	1	1	1	3.95
TGEN-13	Duo	Female	DEPDC5	Autosomal dominant	1	2	1	4.02
TGEN-14	Trio	Male	USP9X	X-linked dominant	14	7	2	0.79
TGEN-15	Trio	Female	SLC52A3	Autosomal reccesive	2	1	1	1.58
TGEN-16	Single	Female	SCN2A	Autosomal dominant	58	4	4	0.9
TGEN-17	Trio	Female	SKIV2L	Autosomal reccesive	1	1	1	0.27
TGEN-18	Trio	Female	ARID1B	Autosomal dominant	7	1	1	0.98
TGEN-19	Trio	Male	KAT6B	Autosomal dominant	1	1	1	1.15
TGEN-20	Trio	Female	GALNS	Autosomal reccesive	1	1	1	0.24
TGEN-21	Trio	Female	NSD2	Autosomal dominant	6	5	2	1.27
TGEN-22	Trio	Male	NALCN	Autosomal dominant	132	4	1	0.28
TGEN-23	Trio	Female	AFG3L2 and SPG7	Autosomal dominant	91; 23	19; 5	1; N/A	1.85; <0

[truncated: 4 more sheets: Table S11, Table S12, Table S13, Table S14]
